# Supplementary material
Source: PubMed Central journal article supplement (PMC6439762)
Supplement: jama-321-354-s004.pdf [file jama-321-354-s004.pdf]

Onland W, Cools F, Kroon A, et al; STOP-BPD Study Group. Effect of hydrocortisone therapy initiated 7 to 14 days after birth on mortality or bronchopulmonary dysplasia among very preterm infants receiving mechanical ventilation: a randomized clinical trial [published January 29, 2019]. *JAMA*. doi:10.1001/jama.2018.21443

## **Data Sharing Statement**

### **Data**

**Data available:** No

### **Additional Information**

**Explanation for why data not available:** De-identified individual participant data will be shared after completing and reporting the two-year follow-up of the study cohort. The data will be available for investigators conducting a regular or individual patient data meta-analysis on corticosteroid use in preterm infants.
